# Supplementary material for: Structural Prediction and Characterization of Canavalia grandiflora (ConGF) Lectin Complexed with MMP1: Unveiling the Antiglioma Potential of Legume Lectins
Source: MDPI journal article supplement (doi:10.3390/molecules27207089), 2022-10-20
Supplement: s1 [file s1]

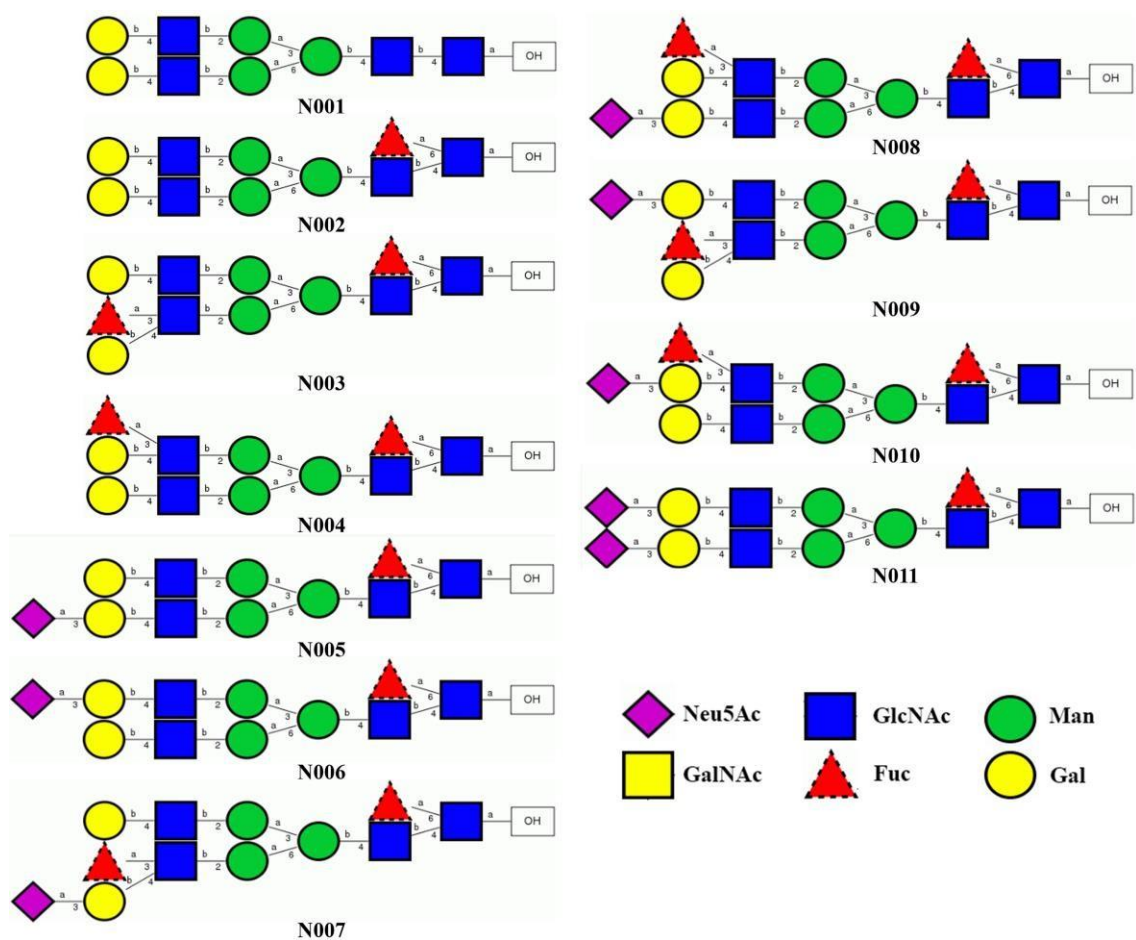

**Figure S1.** MMP1 N-glycan structures present in normal fibroblast cells. Representations based on the experimental results of Saarinen et al., 1999.

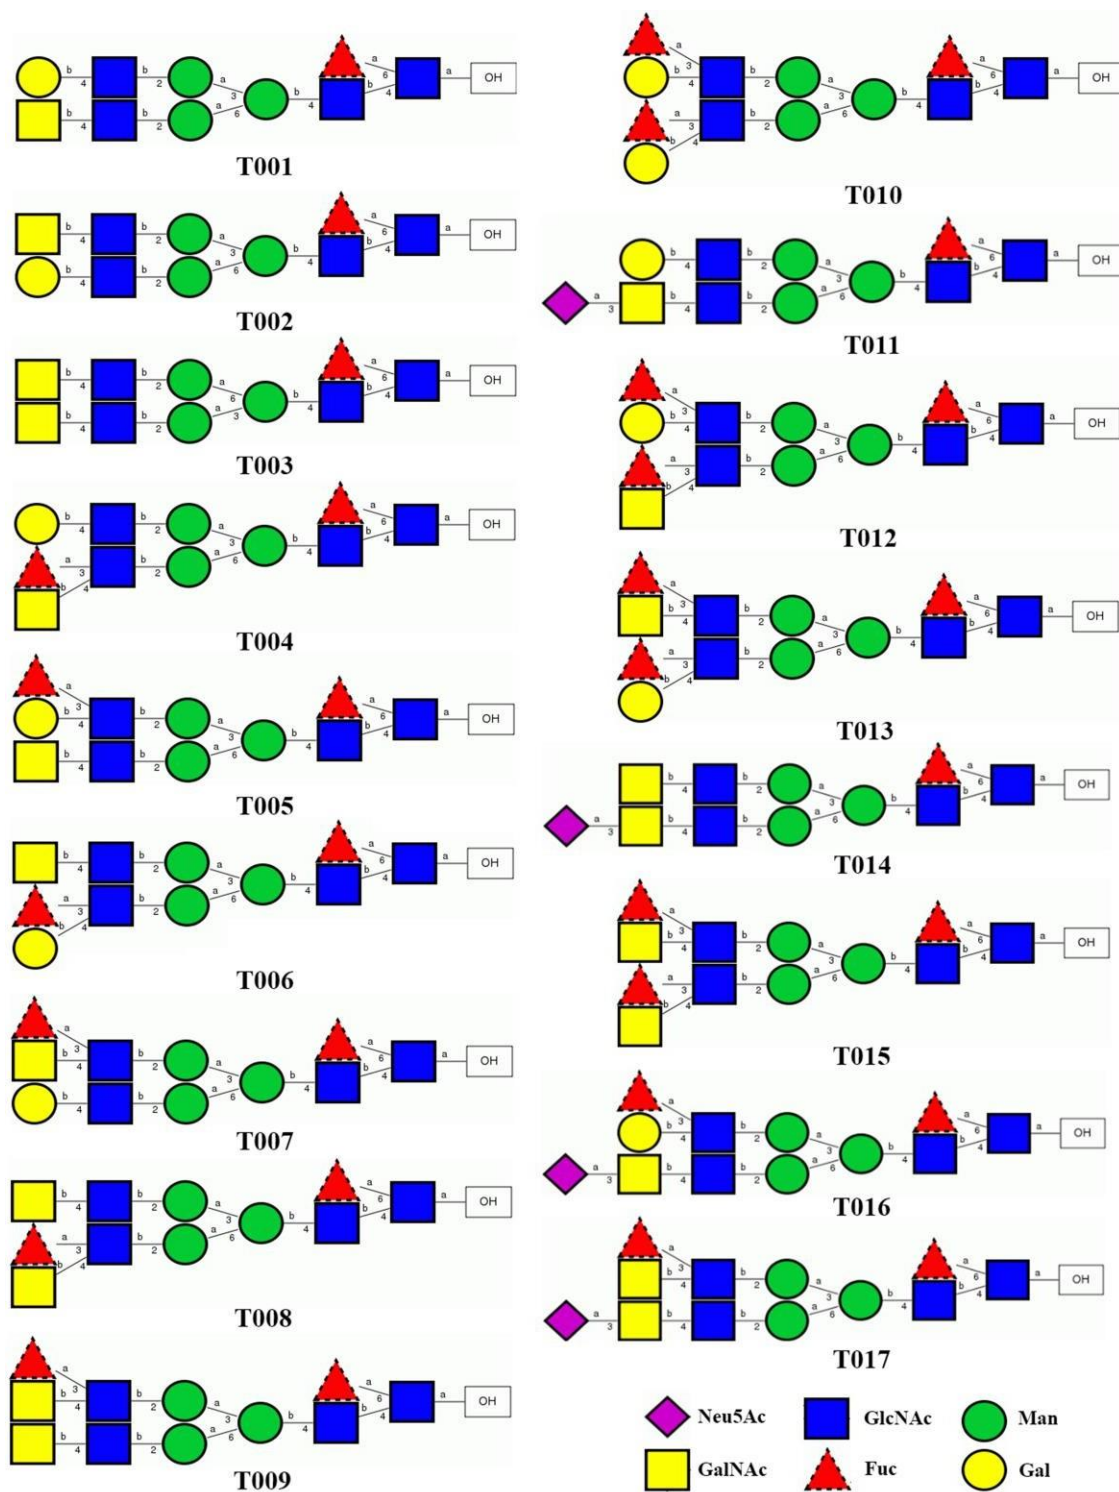

**Figure S2.** MMP1 N-glycan structures present in HT-1080 fibrosarcoma cells. Representations based on the experimental results of Saarinen et al., 1999.
